# Supplementary material
Source: PubMed Central journal article supplement (PMC3463202)
Supplement: CJN.00440112_CJN00440112SupplementaryData.pdf [file CJN.00440112_CJN00440112SupplementaryData.pdf]

## Supplementary Material

**Table S1.** ICD-9 and ICD-10 codes for infection-related hospitalizations.

| Definition       | ICD-9 codes                                                                                                                                                                                                                                                                                                                                                                                                                                                                                                                                                                                                                                                                                                                                     | ICD-10 codes                                                                                                                                                                                                                                                                                                                                                                                                                                                                                                                                                                                                                                                                                                                                                                                                                                                                                                                                                                                                                                                                                                                                                                                                   |
|------------------|-------------------------------------------------------------------------------------------------------------------------------------------------------------------------------------------------------------------------------------------------------------------------------------------------------------------------------------------------------------------------------------------------------------------------------------------------------------------------------------------------------------------------------------------------------------------------------------------------------------------------------------------------------------------------------------------------------------------------------------------------|----------------------------------------------------------------------------------------------------------------------------------------------------------------------------------------------------------------------------------------------------------------------------------------------------------------------------------------------------------------------------------------------------------------------------------------------------------------------------------------------------------------------------------------------------------------------------------------------------------------------------------------------------------------------------------------------------------------------------------------------------------------------------------------------------------------------------------------------------------------------------------------------------------------------------------------------------------------------------------------------------------------------------------------------------------------------------------------------------------------------------------------------------------------------------------------------------------------|
| Infection (all)  | 001-134, 136, 139, 254.1, 320-326, 331.81, 362, 372.0-372.3, 373.0-373.2, 382, 383.0, 386.33, 386.35, 388.60, 390-392, 421.0,421.1, 422.0, 422.91-422.93, 449, 460-466, 472-473, 474.0, 475, 476.0-476.1, 478.21-478.22, 478.24, 478.29, 480-488, 490, 491.1, 494, 510, 511.0-511.1, 513, 518.6, 519.01, 519.2,522.5, 522.7, 527.3, 528.3, 540-542, 562.01, 562.03, 562.10, 562.13, 566-567, 569.5, 572.0-572.1, 573.1-573.3, 575.0-575.1, 590, 595.0-595.4, 597, 598.0, 599.0, 601, 603.1, 604, 607.1-607.2, 608.0, 608.4, 611.0, 614-615, 616.0-616.1, 616.3-616.4, 616.8, 639.0, 646.6, 647, 670, 675, 680-686, 695.81, 706.0, 711, 727.89, 728.0, 730.0-730.3, 730.8-730.9, 780.60, 785.52, 790.7-790.8, 958.3, 996.6, 997.62, 998.5, 999.3 | A00-A32, A34-A99, B00-B89, B95-B97, B99, D73.3, E32.1, G00-G02, G04.0, G04.2, G05-G09, G53.1, G63.0, G73.4, G93.7, G94.0, H00, H01.0, H03, H05.0, H06.1, H10.0, H10.2-H10.5, H10.8 -H10.9, H13.0-H13.2, H19.0-H19.2, H22.0, H32.0, H44.0, H60, H62.0-H62.4, H66, H67.0-H67.1, H70.0, H75.0, H83.0, H92.1, H94.0, I00-I02, I30.1, I32.0-I32.1, I33.0, I39, I40.0, I41.0-I41.2, I43.0, I52.0- I52.1, I68.1, I79, I98.0-I98.2, I98.8, J00-J06, J09-J22, J31-J32, J34.0, J35.0, J36-J37, J39.0-J39.1, J40, J41.1, J44.0, J47, J65, J85-J86, K04.6-K04.7, K11.3, K12.2, K23.0, K35-K37, K57.0, K57.2, K57.4, K57.8, K61, K63.0, K65.0, K65.9, K67, K75.0, K77.0, K81, L00-L08, L30.3, L70.2, M00-M01, M03, M46.2-M46.5, M49.0-M49.3, M60.0, M63.0-M63.2, M65.0-M65.1, M68.0, M71.0-M71.1, M86, M90.0-M90.2, N08.0, N10, N11.0-N11.1, N11.8, N12, N13.6, N15.1, N16.0, N29.0-N29.1, N30.0-N30.3, N33-N34, N35.1, N39.0, N41, N43.1, N45, N48.1-N48.2, N49, N51, N61, N70-N74, N75.1, N76.0-N76.4, N77.0-N77.1, N98.0, O03.0, O03.5, O04.0, O04.5, O05.0, O05.5, O08.0, O23, O85, O86, O91, O98, R00, R01, R02, R50.8, R50.9, R57.2, T79.3, T80.2, T81.4, T82.6, T82.7, T83.5-T83.6, T84.5-T84.7, T85.7, T87.4, T88.0 |
| Abdominal        | 001-003.0, 003.8-006.3, 007-009, 014, 032.83, 039.2, 070, 098.86, 112.85, 540-542, 569.5, 572-572.1, 573.1-573.3                                                                                                                                                                                                                                                                                                                                                                                                                                                                                                                                                                                                                                | A00-A02.0, A02.8, A02.9, A03-A06.4, A07-A09, A18.3, A42.1, B15-B19, B37.8, K35-K37, K57.0, K57.2, K57.4, K57.8, K63.0, K67.1, K75.0, K77.0                                                                                                                                                                                                                                                                                                                                                                                                                                                                                                                                                                                                                                                                                                                                                                                                                                                                                                                                                                                                                                                                     |
| Dialysis-related | 567, 996.62, 996.68, 996.69                                                                                                                                                                                                                                                                                                                                                                                                                                                                                                                                                                                                                                                                                                                     | T82.7, T85.7, K65.0, K65.9                                                                                                                                                                                                                                                                                                                                                                                                                                                                                                                                                                                                                                                                                                                                                                                                                                                                                                                                                                                                                                                                                                                                                                                     |
| Genitourinary    | 016, 032.84, 054.1, 098.0-098.3, 112.1-112.2, 590, 595.0-595.4, 597, 598.0, 599.0, 601, 603.1, 604, 607.1-607.2, 608.0, 608.4, 614-616.1, 616.3-616.4, 616.8, 996.64                                                                                                                                                                                                                                                                                                                                                                                                                                                                                                                                                                            | A18.1, A60.0, A54.0-A54.2, B37.3-B37.4, N10, N11.0-N11.1, N11.8, N12, N30.0-N30.3, N33, N34, N35.1, N39.0, N41, N43.1, N45, N48.1-N48.2, N49, N51, N70-N74, N75.1, N76.0-N76.4, N77.0-N77.1, T83.5—T83.6                                                                                                                                                                                                                                                                                                                                                                                                                                                                                                                                                                                                                                                                                                                                                                                                                                                                                                                                                                                                       |
| Musculoskeletal  | 015, 098.5, 711, 727.89, 728.0, 730-730.3, 730.8-730.9, 996.66—996.67                                                                                                                                                                                                                                                                                                                                                                                                                                                                                                                                                                                                                                                                           | A18.0, A54.4, M00-M01, M03, M46.2-M46.5, M49.0-M49.3, M60.0, M63.0-M63.2, M65.0-M65.1, M68.0, M71.0-M71.1, T84.5-T84.7                                                                                                                                                                                                                                                                                                                                                                                                                                                                                                                                                                                                                                                                                                                                                                                                                                                                                                                                                                                                                                                                                         |
| Pneumonia        | 480-486, 487.0                                                                                                                                                                                                                                                                                                                                                                                                                                                                                                                                                                                                                                                                                                                                  | J12-J18, J10.0, J11.0, J85.1                                                                                                                                                                                                                                                                                                                                                                                                                                                                                                                                                                                                                                                                                                                                                                                                                                                                                                                                                                                                                                                                                                                                                                                   |
| Septicemia       | 003.1, 022.3, 036.2, 038, 054.5,                                                                                                                                                                                                                                                                                                                                                                                                                                                                                                                                                                                                                                                                                                                | A40 -A41, O85, A02.1, A22.7, A26.7, A32.7,                                                                                                                                                                                                                                                                                                                                                                                                                                                                                                                                                                                                                                                                                                                                                                                                                                                                                                                                                                                                                                                                                                                                                                     |

|       |                                                                                                                                 |                                                                                                                                               |
|-------|---------------------------------------------------------------------------------------------------------------------------------|-----------------------------------------------------------------------------------------------------------------------------------------------|
|       | 112.5, 790.7, 785.52                                                                                                            | A39.2, A39.3-A39.4, A42.7, B37.7, R57.2                                                                                                       |
| Skin  | 006.6, 017.0, 031.1, 032.85, 039.0, 054.0, 103, 110-111, 112.3, 116.2, 680-686.9, and 706.0                                     | A06.7, A18.4, A31.1, A36.3, A43.1, A44.1, A67, B00.0, B00.1, B35, B36, B37.2, B38.3, B40.3, B43.0, B45.2, B46.3, B48.0, L00-L08, L30.3, L70.2 |
| Other | All infection codes not included in abdominal, dialysis-related, genitourinary, musculoskeletal, pneumonia, septicemia or skin. | All infection codes not included in abdominal, dialysis-related, genitourinary, musculoskeletal, pneumonia, septicemia or skin.               |
